# Supplementary material
Source: HighWire-hosted journal article supplement (https://jech.bmj.com/content/72/4/331)
Supplement: inline-supplementary-material-1 [file inline-supplementary-material-1.pdf]

## How many people have been bitten by dogs?: A cross-sectional survey of prevalence, incidence, and factors associated with dog bites in a UK community

Carri Westgarth, Megan Brooke, Robert Christley

### Supplementary file – Univariable analysis of factors associated with having ever been bitten by a dog

| Variable              | N                                                   | Bitten by dog<br>(n, %) | Not bitten by a<br>dog (n, %) | OR          | 95%CI       | P                  |              |
|-----------------------|-----------------------------------------------------|-------------------------|-------------------------------|-------------|-------------|--------------------|--------------|
| Gender                | Female                                              | 366                     | 77 (21.0%)                    | 289 (79.0%) | 1.00        |                    |              |
|                       | Male                                                | 314                     | 95 (30.3%)                    | 219 (69.7%) | <b>1.63</b> | <b>1.15 – 2.31</b> | <b>0.006</b> |
|                       | Missing                                             |                         | 0                             | 0           |             |                    |              |
| Current dog ownership | Non dog owner                                       | 482                     | 111(23.0%)                    | 371 (77.0%) | 1.00        |                    |              |
|                       | Dog owner                                           | 198                     | 61 (30.8%)                    | 137 (69.2%) | <b>1.45</b> | <b>1.03 – 2.13</b> | <b>0.03</b>  |
|                       | Missing                                             |                         | 0                             | 0           |             |                    |              |
| Number of dogs        | Owns no dogs                                        | 482                     | 111(23.0%)                    | 371(77.0%)  | 1.00        |                    | <b>0.05</b>  |
|                       | Owns one dog                                        | 174                     | 51(29.3%)                     | 123(70.7%)  | 1.39        | 0.94 – 2.05        |              |
|                       | Owns multiple dogs                                  | 24                      | 10 (41.7%)                    | 14(58.3%)   | <b>2.39</b> | <b>1.03 – 5.52</b> |              |
|                       | Missing                                             |                         | 0                             | 0           |             |                    |              |
| Dog walking           | Not main dog walker                                 | 59                      | 18 (30.5%)                    | 41 (69.5%)  | 1.00        |                    |              |
|                       | Main dog walker                                     | 130                     | 42 (32.3%)                    | 88 (67.7%)  | 1.04        | 0.56 – 2.11        | 0.81         |
|                       | Missing*                                            |                         | 0                             | 0           |             |                    |              |
| Age                   | Years                                               | 668                     | Median - 59                   | Median 57.5 |             |                    | 0.32         |
|                       | Missing                                             |                         | 1                             | 11          |             |                    |              |
| Highest Education     | Other school certificate or none                    | 97                      | 23 (23.7)                     | 74 (76.3)   | 1.00        |                    | 0.28         |
|                       | GCSE or O'level equivalent                          | 146                     | 44 (30.1)                     | 102 (69.9)  | 1.39        | 0.77-2.50          |              |
|                       | A level equivalent                                  | 67                      | 12 (17.9)                     | 55 (82.1)   | 0.70        | 0.32-1.53          |              |
|                       | Degree/diploma or higher professional qualification | 294                     | 77 (26.2)                     | 217 (73.8)  | 1.14        | 0.67-1.95          |              |
|                       | Missing*                                            |                         | 6                             | 58          |             |                    |              |
| General health        | Excellent                                           | 92                      | 18 (19.6%)                    | 74 (80.4%)  | 1.00        |                    | 0.10         |

|                          |                         |            |             |             |              |                    |       |
|--------------------------|-------------------------|------------|-------------|-------------|--------------|--------------------|-------|
| Reason for getting a dog | Very good               | 218        | 60 (27.5%)  | 158 (72.5%) | 1.56         | 0.86 – 2.83        |       |
|                          | Good                    | 240        | 51(21.3%)   | 189 (78.8%) | 1.11         | 0.61 – 2.023       |       |
|                          | Poor                    | 31         | 10 (32.3%)  | 21 (67.7%)  | 1.958        | 0.786 – 4.88       |       |
|                          | Fair                    | 92         | 30 (32.6%)  | 62 (67.4%)  | <b>1.989</b> | <b>1.01 – 3.91</b> |       |
|                          | Missing                 |            | 3           | 4           |              |                    |       |
|                          | Companionship - Yes     | 116        | 36 (31.0%)  | 80 (69.0%)  | 1.00         |                    |       |
|                          | No                      | 73         | 24 (32.9%)  | 49 (67.1%)  | 1.01         | 0.58 – 2.04        | 0.79  |
|                          | Family wanted- Yes      | 72         | 17 (23.6%)  | 55 (76.4%)  | 1.00         |                    |       |
|                          | No                      | 117        | 43 (36.8%)  | 74(63.2%)   | 1.88         | 0.97 – 3.64        | 0.06  |
|                          | Exercise – Yes          | 64         | 21 (32.8%)  | 43 (67.2%)  | 1.08         | 0.566 – 2.05       |       |
|                          | No                      | 125        | 39 (31.2%)  | 86 (68.8%)  | 1.00         |                    | 0.82  |
|                          | Always had dog – Yes    | 58         | 20 (34.5%)  | 38 (65.5%)  | 1.20         | 0.62 – 2.31        | 0.56  |
|                          | No                      | 131        | 40 (30.5%)  | 91 (69.5%)  | 1.00         |                    |       |
|                          | Interest - Yes          | 33         | 13 (39.4%)  | 20 (60.6%)  | 1.51         | 0.69 – 3.28        | 0.30  |
|                          | No                      | 156        | 47 (30.1%)  | 109 (69.9%) | 1.00         |                    |       |
|                          | Other - Yes             | 12         | 6 (50%)     | 6 (50%)     | 2.28         | 0.70 – 7.38        | 0.16  |
|                          | No                      | 177        | 54 (30.5%)  | 123 (69.5%) | 1.00         |                    |       |
|                          | For protection – Yes    | 11         | 4 (36.4%)   | 7 (63.4%)   | 1.25         | 0.35 – 4.43        | 0.74  |
|                          | No                      | 178        | 56 (31.5%)  | 122 (68.5%) | 1.000        |                    |       |
| Gift- Yes                | 6                       | 2 (33.3%)  | 4 (66.7%)   |             |              |                    |       |
| No                       | 183                     | 58 (31.7%) | 125 (68.3%) |             |              |                    |       |
| Working Dog- Yes         | 5                       | 2 (40%)    | 3 (60%)     |             |              |                    |       |
| No                       | 184                     | 58 (31.5%) | 126 (68.5%) |             |              |                    |       |
| Show Dog- Yes            | 1                       | 1 (100%)   | 0 (0%)      |             |              |                    |       |
| No                       | 188                     | 60 (31.9%) | 128 (68.1%) |             |              |                    |       |
| Missing*                 |                         | 0          | 0           |             |              |                    |       |
| Personality Trait        | Extroverted             | 581        | Mean – 4.21 | Mean - 4.28 | 0.97         | 0.86 – 1.09        | 0.61  |
|                          | Missing*                |            | 13          | 38          |              |                    |       |
|                          | Conscientiousness       | 584        | Mean – 5.71 | Mean – 5.76 | 0.96         | 0.80 – 1.14        | 0.40  |
|                          | Missing*                |            | 14          | 34          |              |                    |       |
|                          | Open to new experiences | 582        | Mean - 4.95 | Mean – 4.88 | 1.06         | 0.90 – 1.23        | 0.586 |

|                                  |     |             |             |             |                    |              |
|----------------------------------|-----|-------------|-------------|-------------|--------------------|--------------|
| Missing*                         |     | 14          | 36          |             |                    |              |
| Agreeableness                    | 582 | Mean – 5.34 | Mean - 5.40 | 0.95        | 0.81 – 1.12        | 0.434        |
| Missing*                         |     | 14          | 36          |             |                    |              |
| Emotional stability <sup>§</sup> | 585 | Mean – 5.01 | Mean – 5.11 | <b>0.82</b> | <b>0.72 - 0.94</b> | <b>0.005</b> |
| Missing*                         |     | 13          | 34          |             |                    |              |

\*not all of the 680 people who responded on whether they had been bitten were asked this question

<sup>§</sup> Emotional stability also known as neuroticism
